# Supplementary material
Source: PubMed Central journal article supplement (PMC5373924)
Supplement: NIHMS809999-supplement-Supplemental_Data.pdf [file NIHMS809999-supplement-Supplemental_Data.pdf]

**SUPPLEMENTAL MATERIAL:****Supplemental Table 1: Article search terms by database**

|                                                                                                                                                                                                                                                                                                                                       |
|---------------------------------------------------------------------------------------------------------------------------------------------------------------------------------------------------------------------------------------------------------------------------------------------------------------------------------------|
| <i>Medline/Pubmed Search Terms:</i>                                                                                                                                                                                                                                                                                                   |
| “Colon”[Mesh] OR "Cecum"[Mesh] OR "Colonic Neoplasms"[Mesh] OR "Cecal Neoplasms"[mesh] OR "Colon, Ascending"[Mesh] OR right colon[tiab] OR ascending colon[tiab] OR cecum[tiab] OR caecum;[tiab] OR coecum[tiab] OR OR cecal[tiab] OR hepatic flexure*[tiab] OR right side[tiab] OR proximal colon[tiab] OR colon[tiab]               |
| <i>Embase Search Terms:</i>                                                                                                                                                                                                                                                                                                           |
| ((retro NEXT/1 flex*):ab,ti OR retroflex*:ab,ti OR retroview:ab,ti) AND ('cecum cancer'/exp OR 'cecum'/exp OR 'ascending colon'/exp OR 'colon tumor'/exp OR 'colon':ab,ti OR 'right colon':ab,ti OR 'ascending colon':ab,ti OR cecum:ab,ti OR cecal:ab,ti OR 'hepatic flexure':ab,ti OR 'right side':ab,ti OR 'proximal colon':ab,ti) |

**Supplemental Table 2: Quality assessment score of studies included in the meta-analysis**

| Study         | 1 | 2 | 3 | 4 | 5 | 6 | 7 | 8 | Total |
|---------------|---|---|---|---|---|---|---|---|-------|
| Aadam 2013    | 1 | 0 | 1 | 1 | 1 | 1 | 1 | 1 | 7     |
| Baumann 2009  | 0 | 0 | 1 | 1 | 1 | 0 | 1 | 1 | 5     |
| Chandran 2015 | 0 | 1 | 1 | 1 | 1 | 1 | 1 | 1 | 7     |
| Gaddam 2012   | 1 | 1 | 0 | 1 | 1 | 1 | 1 | 1 | 7     |
| Harrison 2004 | 0 | 1 | 0 | 1 | 1 | 1 | 1 | 1 | 6     |
| Hewett 2011   | 1 | 1 | 0 | 1 | 1 | 1 | 1 | 1 | 7     |
| Kushnir 2015  | 1 | 1 | 0 | 1 | 1 | 1 | 1 | 1 | 7     |
| Vargas 2015   | 0 | 1 | 1 | 1 | 1 | 1 | 1 | 1 | 7     |

## Supplemental Figure 1: Study quality assessment tool

### Selection:

#### Representativeness:

1. Was the spectrum of patients representative of the patients who will receive the test (colonoscopy with right colon retroflexion) in practice. (ie. Study includes adults undergoing screening/surveillance) \*\*
  - a. Yes = 1, No = 0
2. Were the exclusion criteria clearly defined? \*\*
  - b. Yes = 1, No = 0
3. Were consecutive patients enrolled in the study? \*
  - c. Yes = 1, No = 0

#### Ascertainment of exposure:

4. Was the definition of successful retroflexion described? \*
  - d. Yes = 1, No = 0

### Comparability

5. Each subject undergoes a consecutive cross-over from non-exposed to exposed, therefore, no confounding exists in this design phase. \*
  - a. All studies = 1

### Outcome

#### Assessment of outcome\*

6. Histology of polyp given: Yes = 1, No = 0
7. Success of retroflexion reported: Yes = 1, No = 0
8. Complications of colonoscopy with retroflexion reported: Yes = 1, No = 0

\* Adapted from Newcastle-Ottawa Scale

\*\* Adapted from QUADAS-2 Scale

If classification of quality measure was unclear, then score of 0 was designated.

A priori score for high quality studies designated  $\geq 7$ . Less than 7 considered low quality.
